# Supplementary material for: Summer temperature response to extreme soil water conditions in the Mediterranean transitional climate regime
Source: Springer Nature journal article supplement (doi:10.1007/s00382-021-05815-8), 2021-06-01
Supplement: MOESM1 [file 382_2021_5815_MOESM1_ESM%20%281%29.pdf]

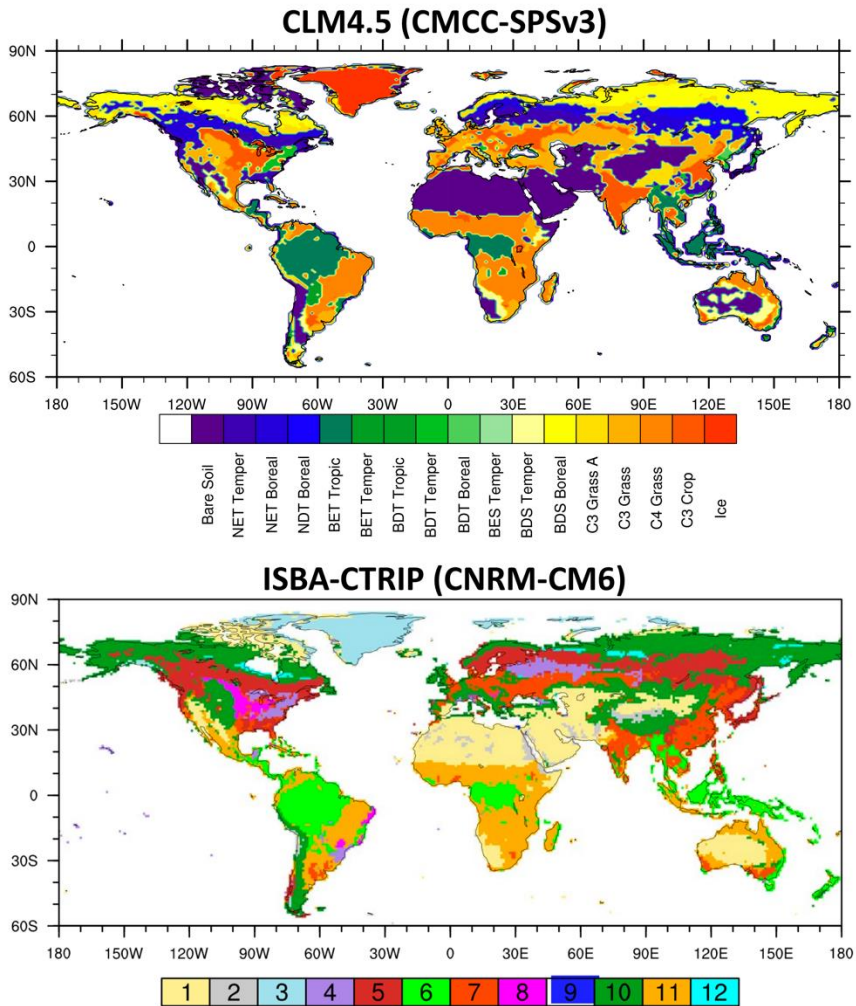

- |    |                                |
|----|--------------------------------|
| 1  | Bare Soil & Desert             |
| 2  | Rocks & Urban area             |
| 3  | Permanent Snow & Ice           |
| 4  | Temperate Broadleaf Deciduous  |
| 5  | Tropical Broadleaf Deciduous   |
| 6  | Temperate Broadleaf Evergreen  |
| 7  | Boreal Broadleaf Deciduous     |
| 8  | Shrub                          |
| 9  | Boreal Needleleaf Evergreen    |
| 10 | Temperate Needleleaf Evergreen |
| 11 | Boreal Needleleaf Deciduous    |
| 12 | Tropical Broadleaf Evergreen   |

Fig. S1. Plant Functional Types in the CMCC and CNRM models.

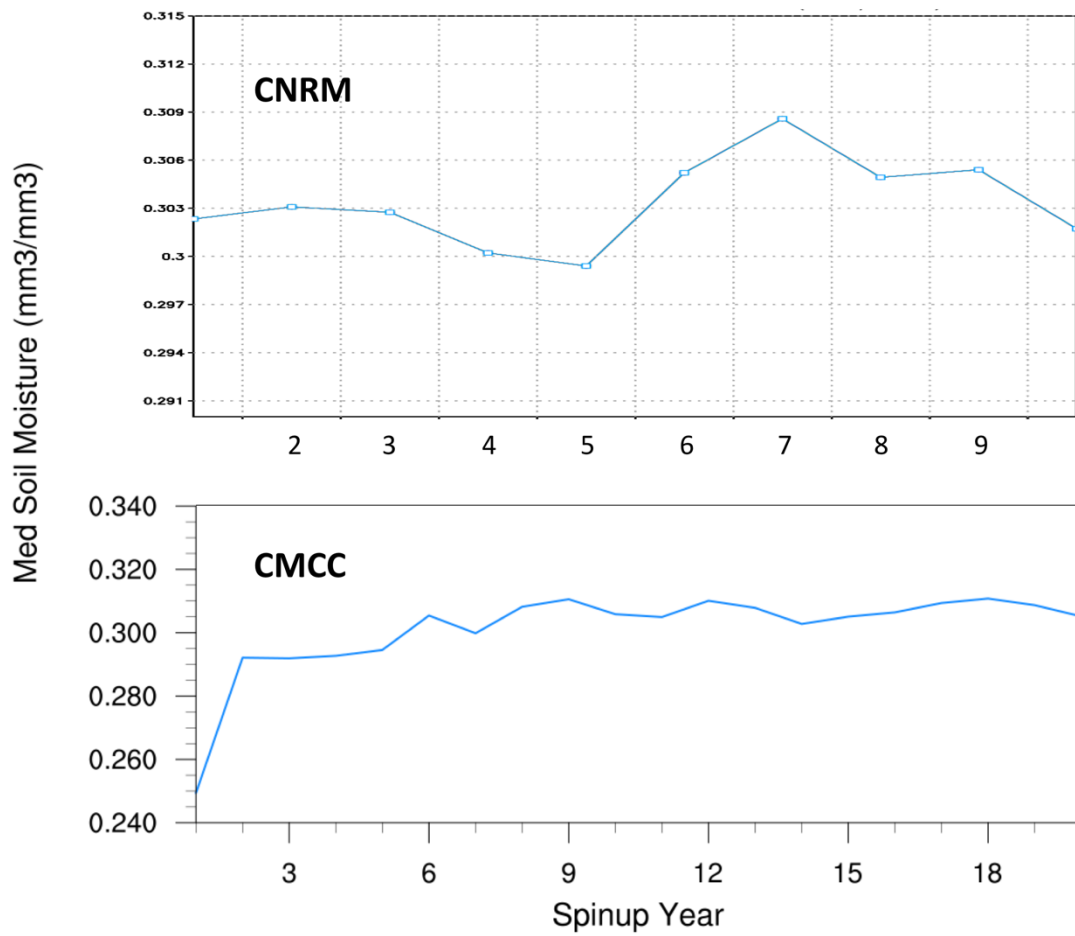

Fig. S2. Soil moisture content, aggregated over the column first 1.25 meters (CNRM) and 1.4 meters (CMCC), averaged over the Enlarged Mediterranean Region (see text for details).

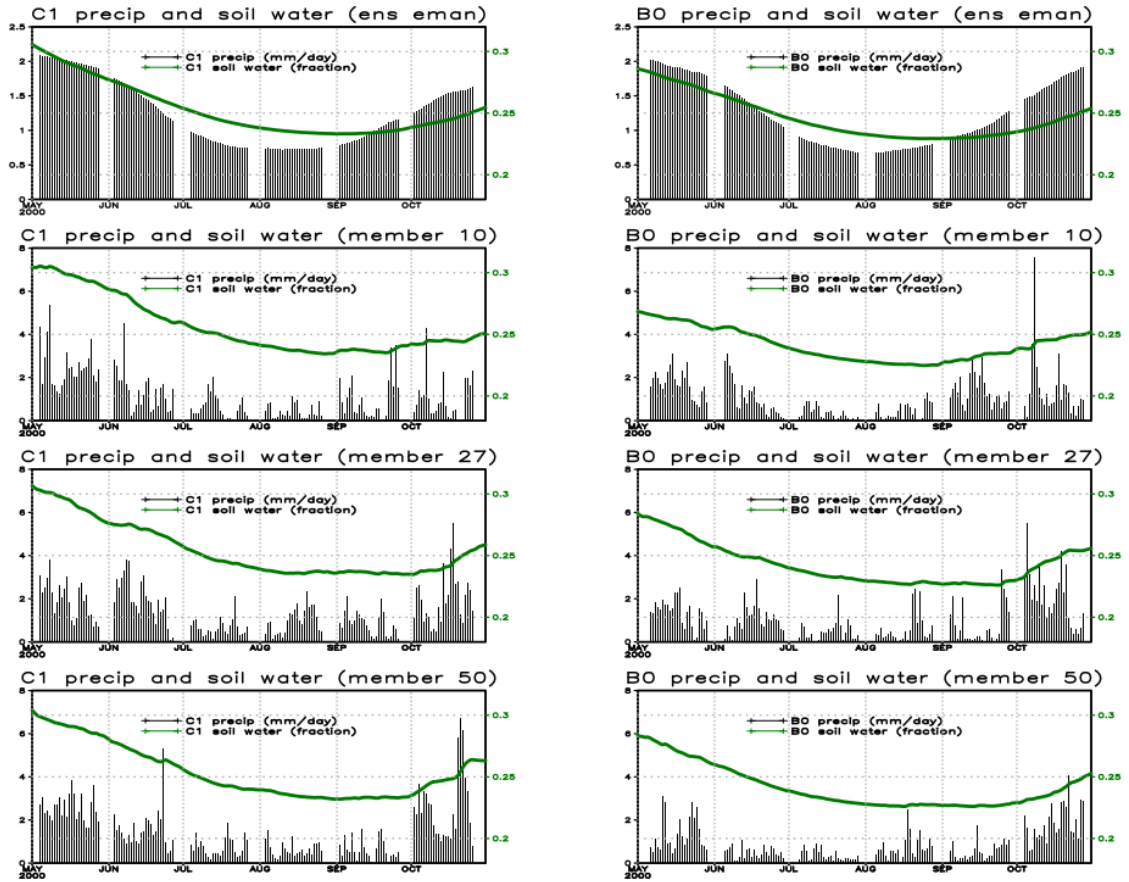

Fig. S3. Time evolution for daily soil moisture and precipitation in the ensemble mean (top panels) and different ensemble members (reported in panels' title) of the CMCC models. SXP-C1 values are shown in left panels, EXP-B0 values are shown in right panels.

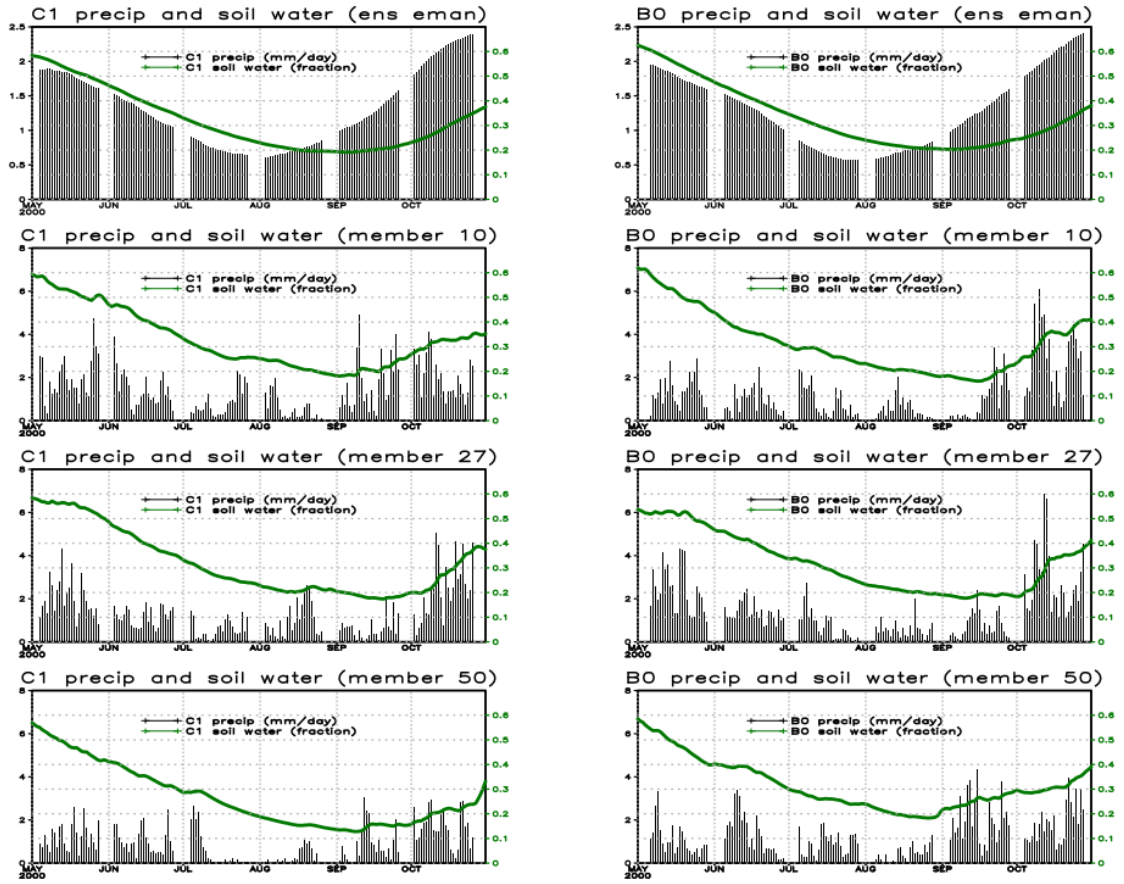

Fig. S4. Same as Fig. S1 but for the CNRM model
